# Supplementary material for: Reconnaissance de cibles par sonar actif large bande : Application à des coques de forme simple et à la classification des espèces de poissons en mer
Source: MDPI journal article supplement (doi:10.3390/ma15155115), 1996-01-01
Supplement: s1 [file s1]

# The Effect of Different Nanomaterials Additions in Clay-Based Composites on the Electromagnetic Transmission

Ivan Vrdoljak <sup>1\*</sup>, Jelena Brdarić <sup>2\*</sup>, Slavko Rupčić <sup>3</sup>, Berislav Marković <sup>2</sup>, Ivana Miličević <sup>1</sup>,  
Vanja Mandrić <sup>3</sup>, Damir Varevac <sup>1</sup>, Dalibor Tatar <sup>2</sup>, Nikolina Filipović <sup>2</sup>, Imre Szenti <sup>4</sup>, Ákos Kukovecz <sup>4</sup>

<sup>1</sup> Josip Juraj Strossmayer University of Osijek, Faculty of Civil Engineering and Architecture Osijek, Vladimira Preloga 3, HR-31000 Osijek, Croatia; ivrdoljak15@gfos.hr (I. Vrdoljak), ivana.milicevic@gfos.hr (I. Miličević), dvarevac@gfos.hr (D. Varevac)

<sup>2</sup> Josip Juraj Strossmayer University of Osijek, Department of Chemistry, Cara Hadrijana 8/A, HR-31000 Osijek; jbrdaric@kemija.unios.hr (J. Brdarić), bmarkovi@kemija.unios.hr (B. Marković), dtatar@kemija.unios.hr (D. Tatar), nfilipovic@kemija.unios.hr (N. Filipović)

<sup>3</sup> Josip Juraj Strossmayer University of Osijek, Faculty of Electrical Engineering, Computing, and Information Technologies Osijek, Kneza Trpimira 2B, HR-31000 Osijek, Croatia; slavko51062@gmail.com (S. Rupčić), vmandric@gmail.com (V. Mandarić)

<sup>4</sup> Interdisciplinary Excellence Centre, Department of Applied and Environmental Chemistry, University of Szeged, Rerrich Béla tér 1, H-6720 Szeged, Hungary; szentiimre@gmail.com (I. Szenti), kakos@chem.u-szeged.hu (A. Kukovecz)

\* Correspondence: ivrdoljak15@gfos.hr (I. Vrdoljak), jbrdaric@kemija@unios.hr (J. Brdarić)

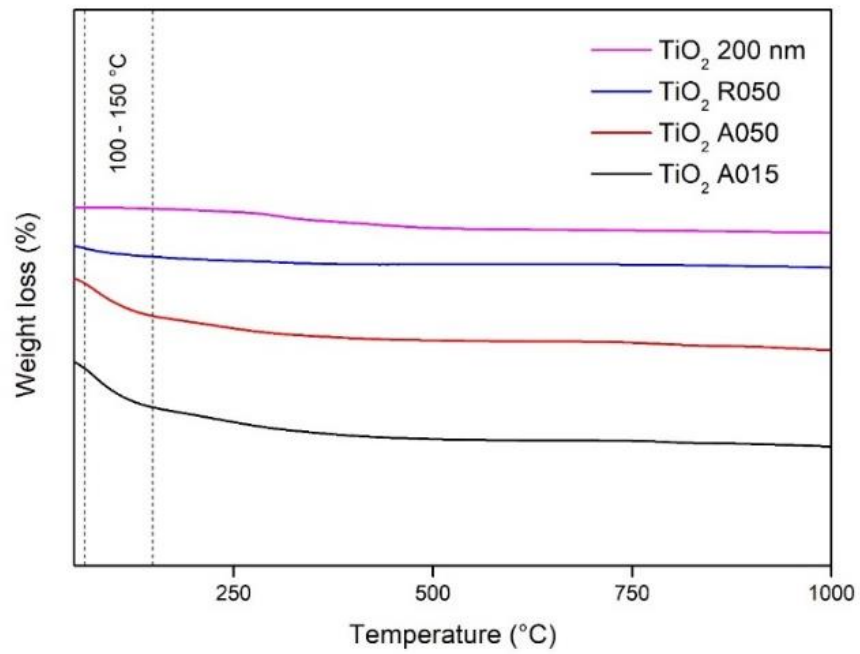

**Figure S1.** Thermograms of the four  $\text{TiO}_2$  samples

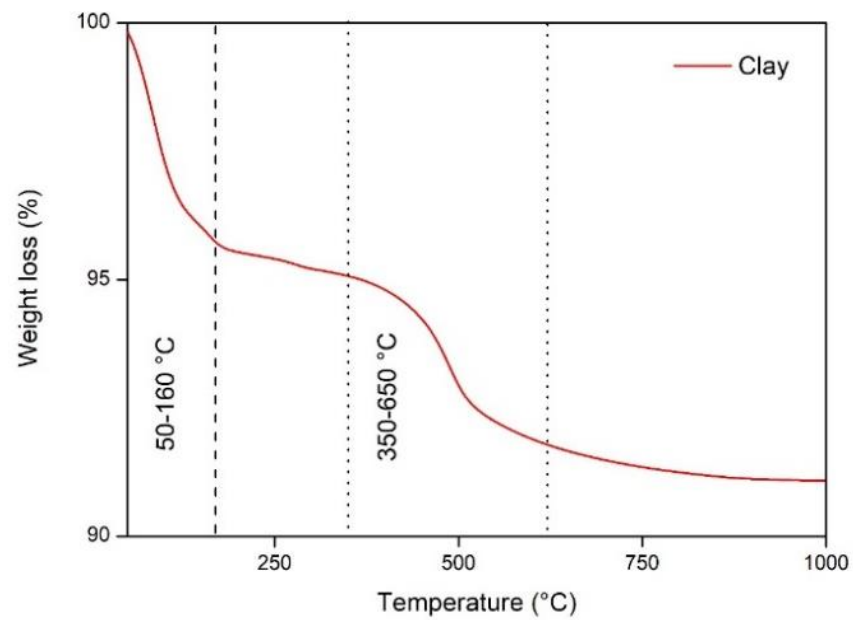

**Figure S2.** Thermogram of the clay sample

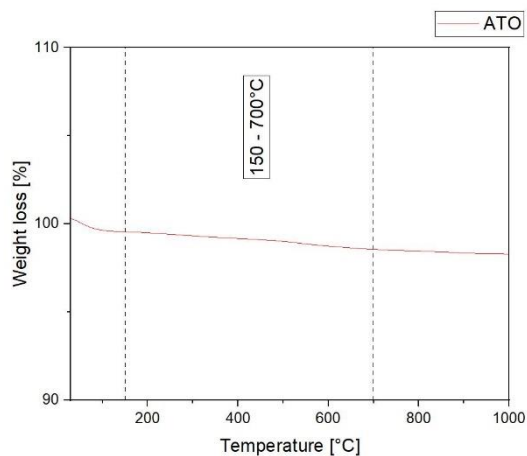

a) Thermogram of the Fly ash

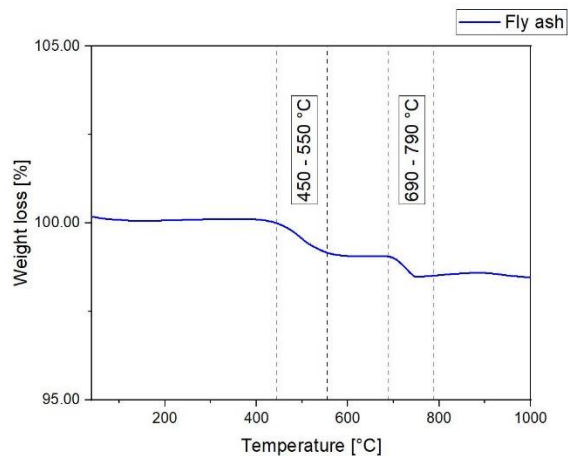

b) Thermogram of the ATO

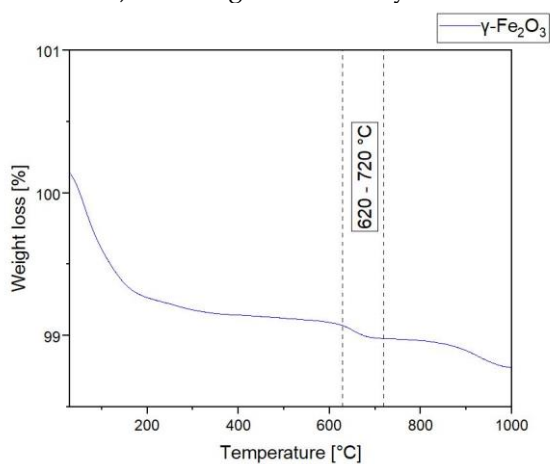

c) Thermogram of the  $\gamma\text{-Fe}_2\text{O}_3$

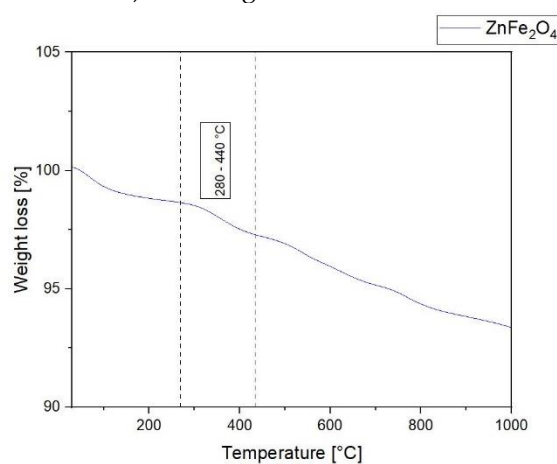

d) Thermogram of the  $\text{ZnFe}_2\text{O}_4$

**Figure S3:** Thermogravimetric analysis of nanomaterials.

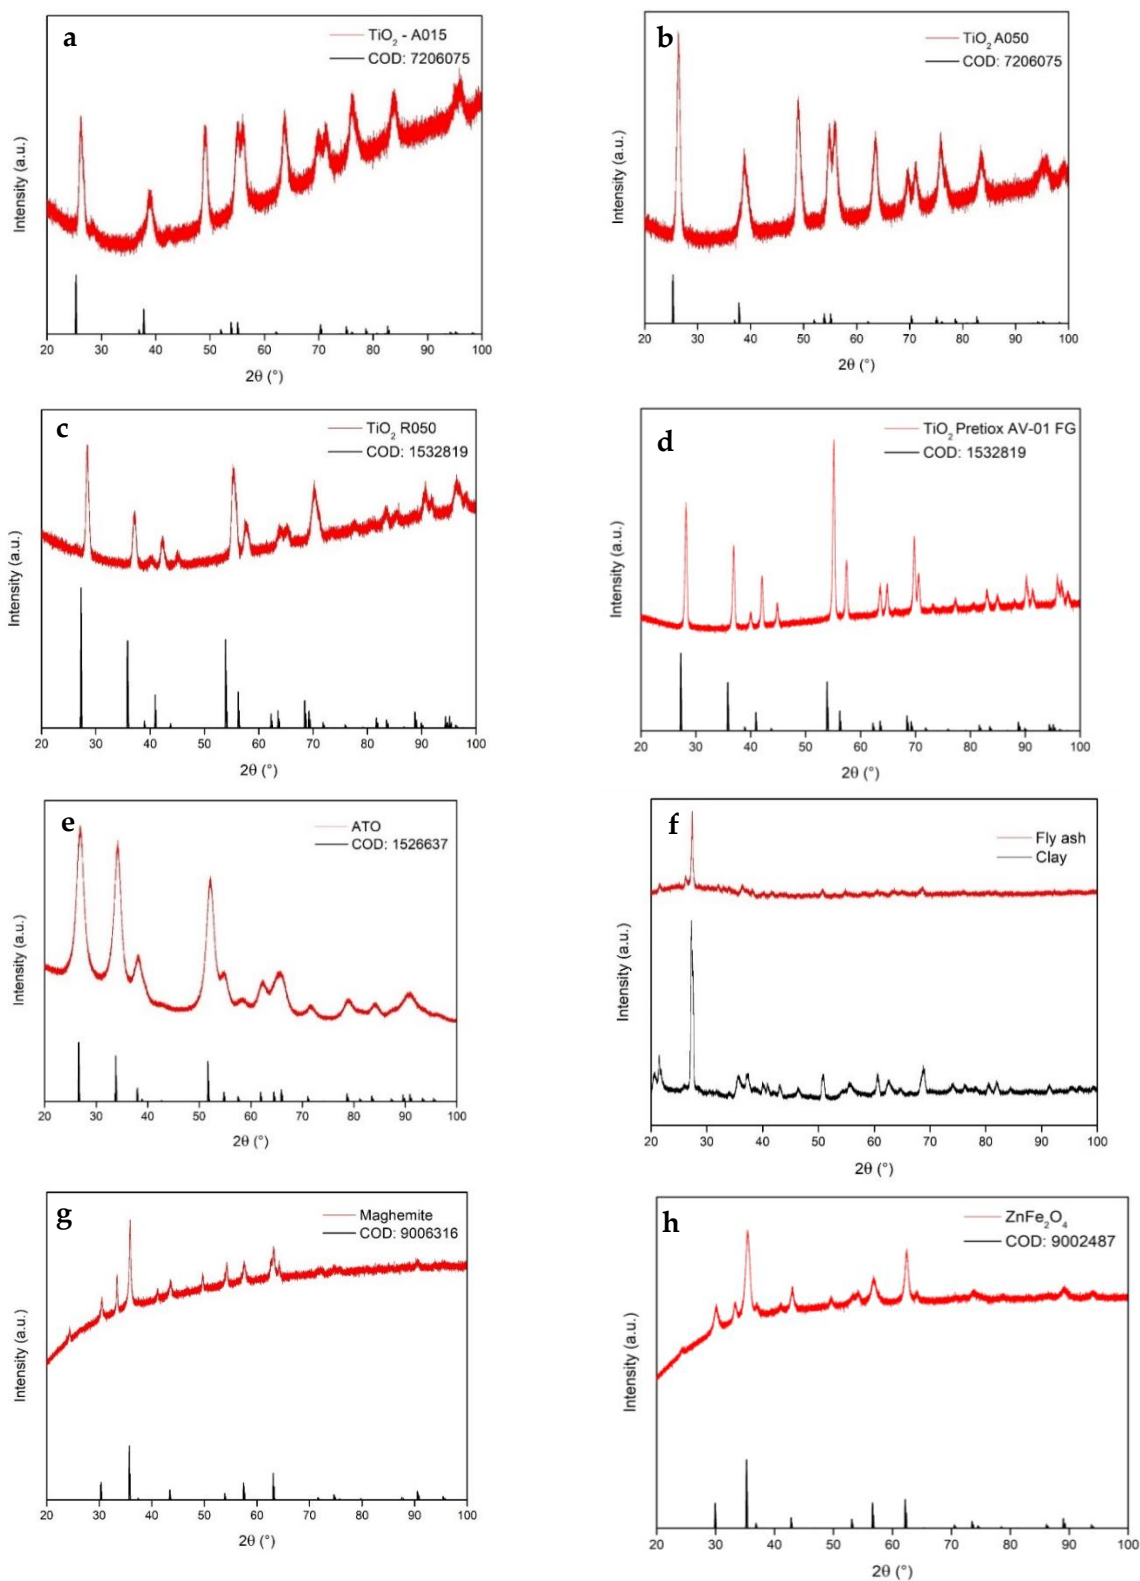

**Figure S4:** Diffraction patterns of: (a)  $\text{TiO}_2$  A015, (b)  $\text{TiO}_2$  A050, (c)  $\text{TiO}_2$  R050, (d)  $\text{TiO}_2$  Pretiox AV-01 FG, (e) ATO, (f) Fly ash and clay, (g)  $\gamma\text{-Fe}_2\text{O}_3$ , (h)  $\text{ZnFe}_2\text{O}_4$ , compared to patterns from Crystallographic Open Database (COD) with their COD ID in legend.
